# Supplementary material for: The LDL-HDL Profile Determines the Risk of Atherosclerosis: A Mathematical Model
Source: PubMed Central journal article supplement (PMC3951264; doi:10.1371/journal.pone.0090497), 2014-03-12
Supplement: pone.0090497.s001.pdf [file pone.0090497.s001.pdf]

---

**Algorithm S 1:** Algorithm for implementation
 

---

**Input** : The initial condition, time stepsize  $\tau$ , the maximum time-steps  $N_T$ , step size for remeshing  $M$ .

Generate a triangular mesh over the domain.

**for**  $n = 0 : N_T$  **do**

- Compute  $L^{n+1}, H^{n+1}, r^{n+1}, L_{ox}^{n+1}, M^{n+1}, P^{n+1}, T^{n+1}, I_\gamma^{n+1}, S^{n+1}, I_{12}^{n+1}, G^{n+1}, Q^{n+1}, Q_r^{n+1}, \rho^{n+1}, F^{n+1}$  by solving equation (33);
- Compute the mean curvature of  $\Gamma_I^n, \kappa^n$ ;
- Compute  $\sigma^{n+1}$  by solving equation (34);
- Compute  $V_n$  in equation (25) and update  $\Gamma_I^{n+1}$ ;
- Remeshing every  $M$  steps.

**end**

---
