# Supplementary material for: The LDL-HDL Profile Determines the Risk of Atherosclerosis: A Mathematical Model
Source: PubMed Central journal article supplement (PMC3951264; doi:10.1371/journal.pone.0090497), 2014-03-12

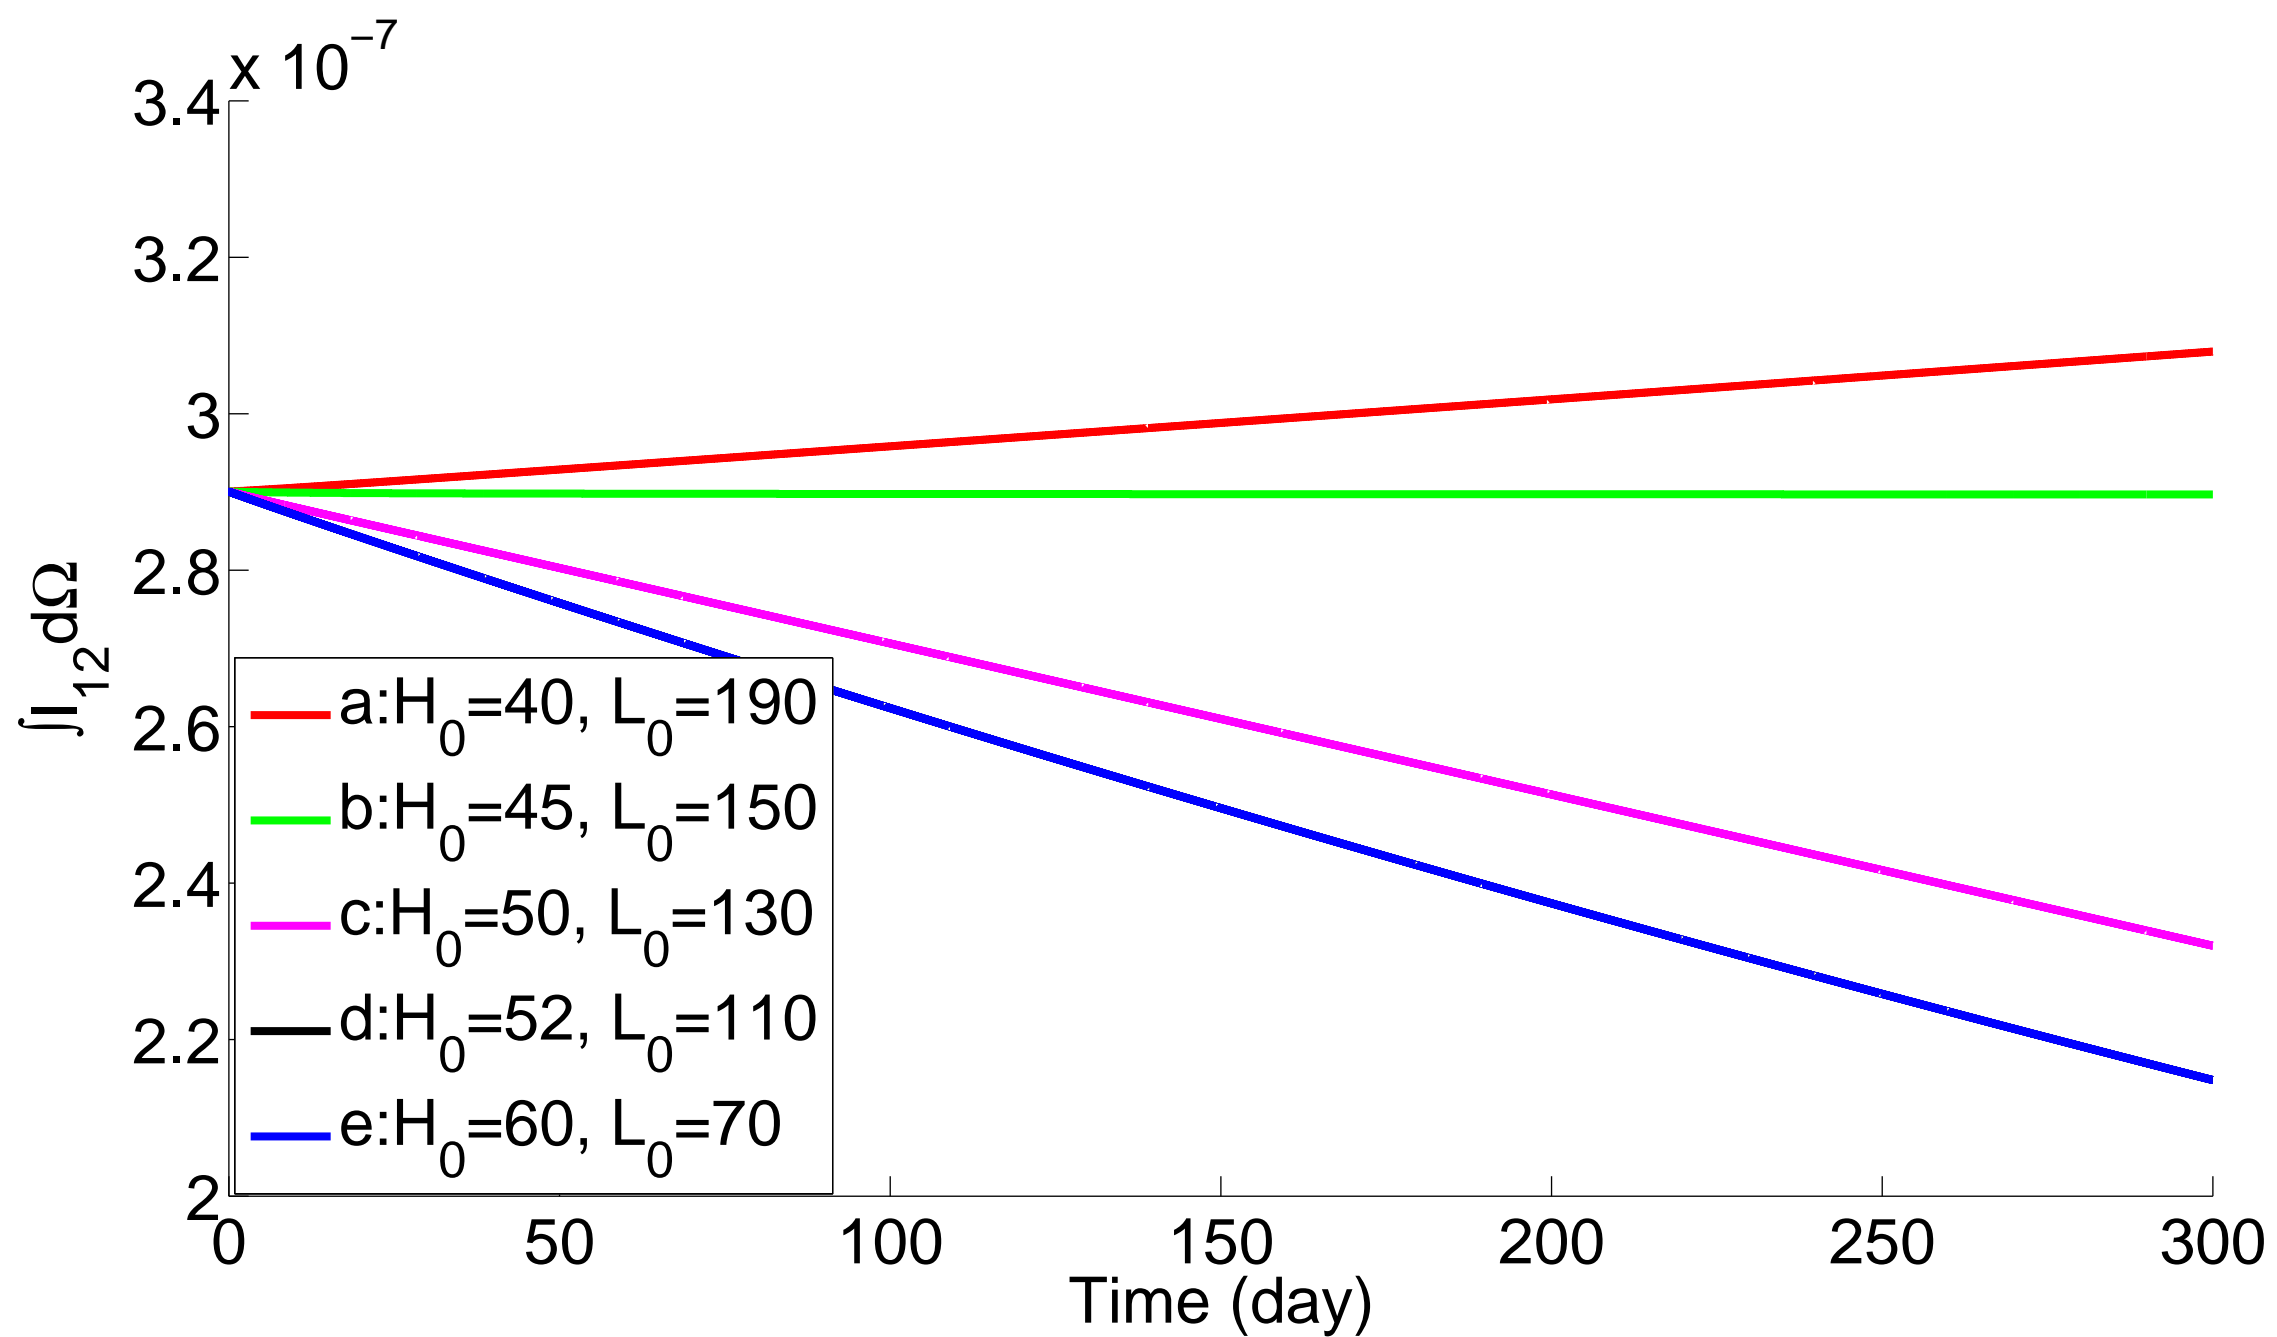

Supplement: pone.0090497.s008.pdf [file pone.0090497.s008.pdf]
